# Supplementary material for: Whole genome sequencing of human Borrelia burgdorferi isolates reveals linked blocks of accessory genome elements located on plasmids and associated with human dissemination
Source: PubMed Central journal article supplement (PMC10470944; doi:10.1371/journal.ppat.1011243), 2023-08-31
Supplement: ppat.1011243.s015.pdf [file ppat.1011243.s015.pdf]

A

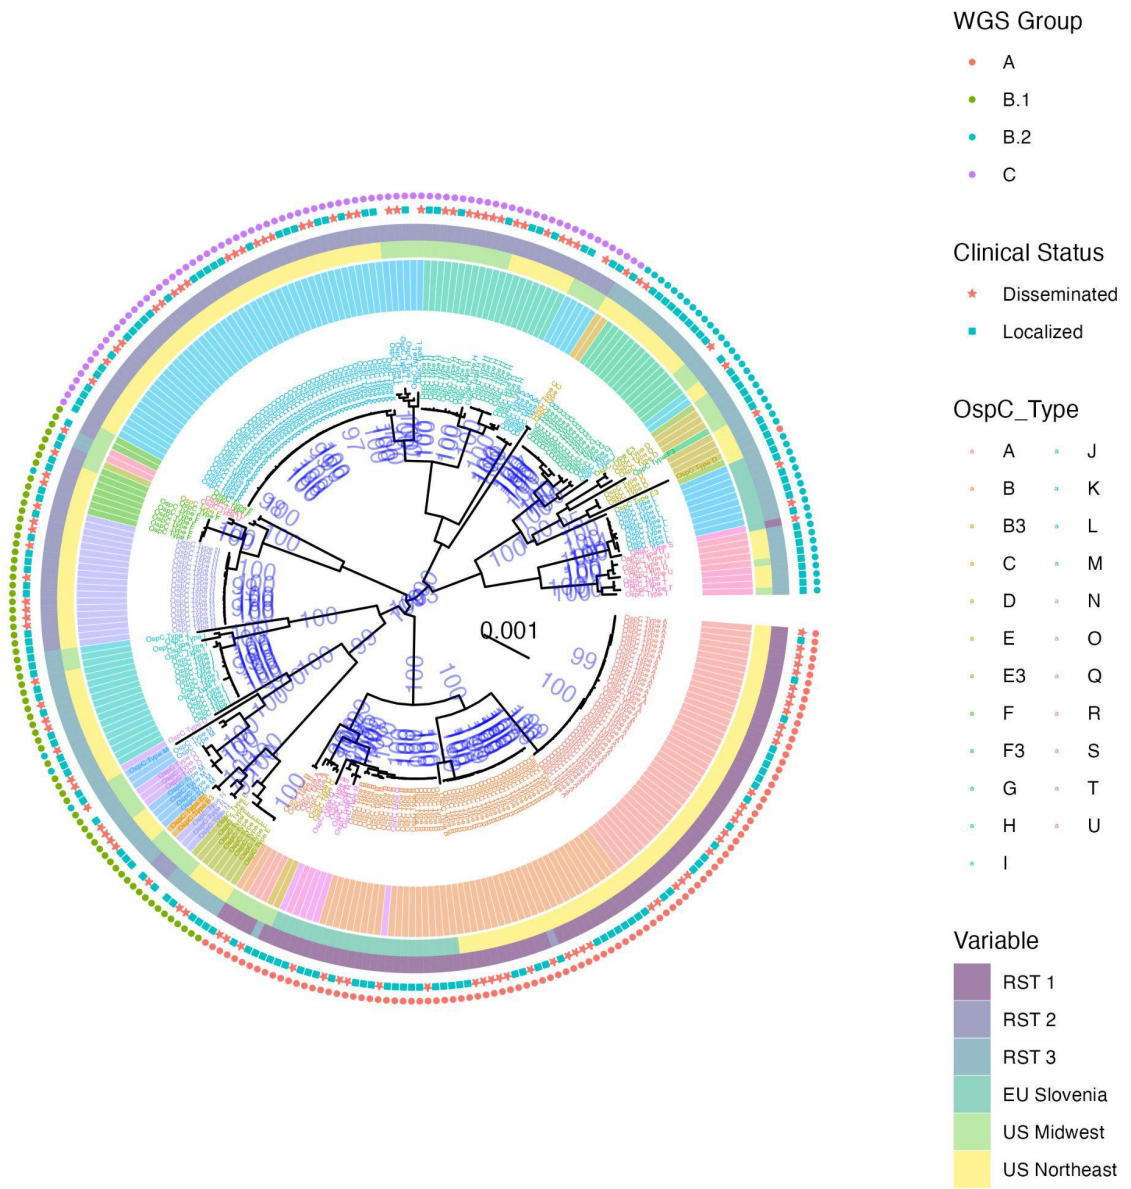

**B**

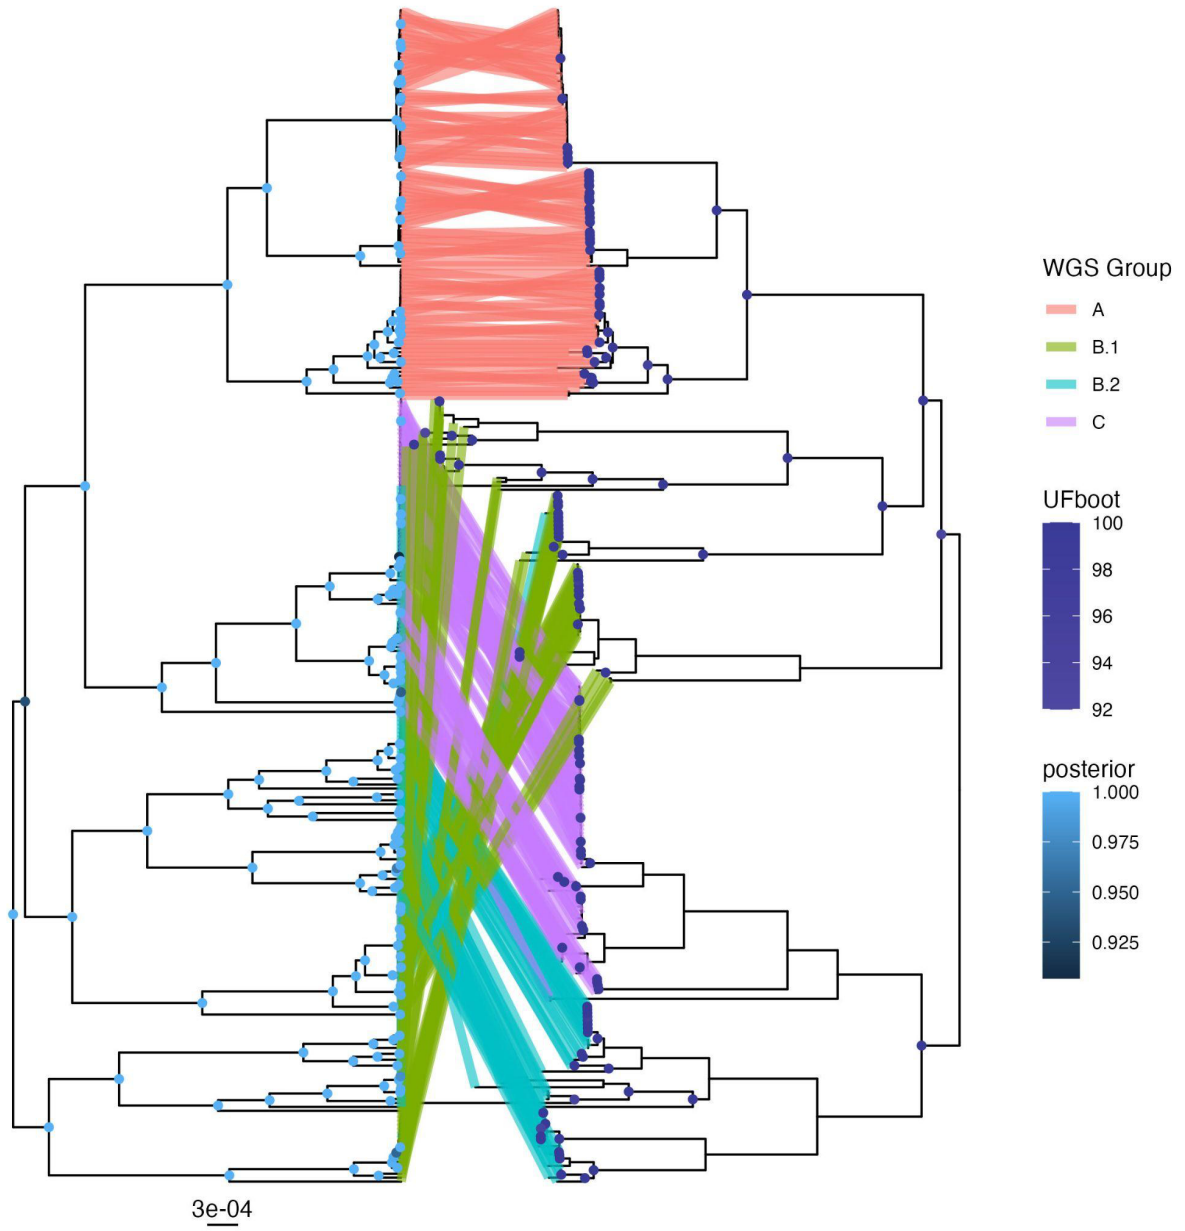

C

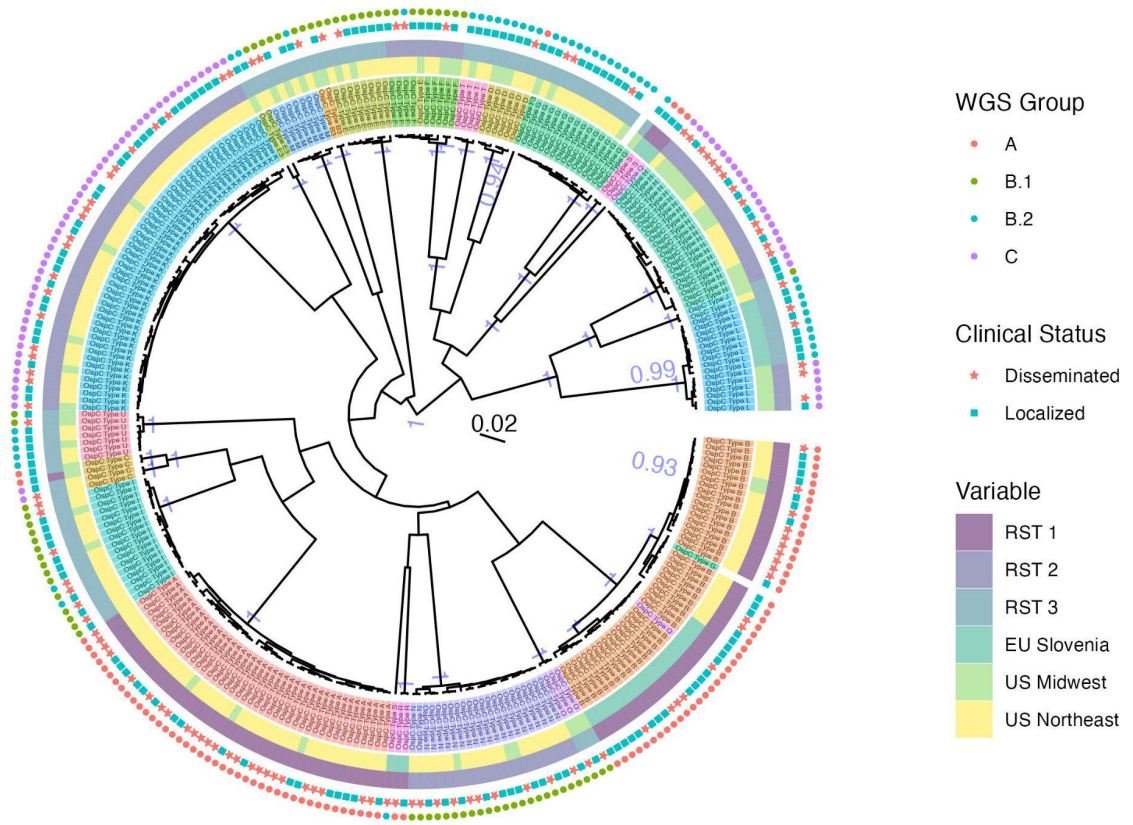

D

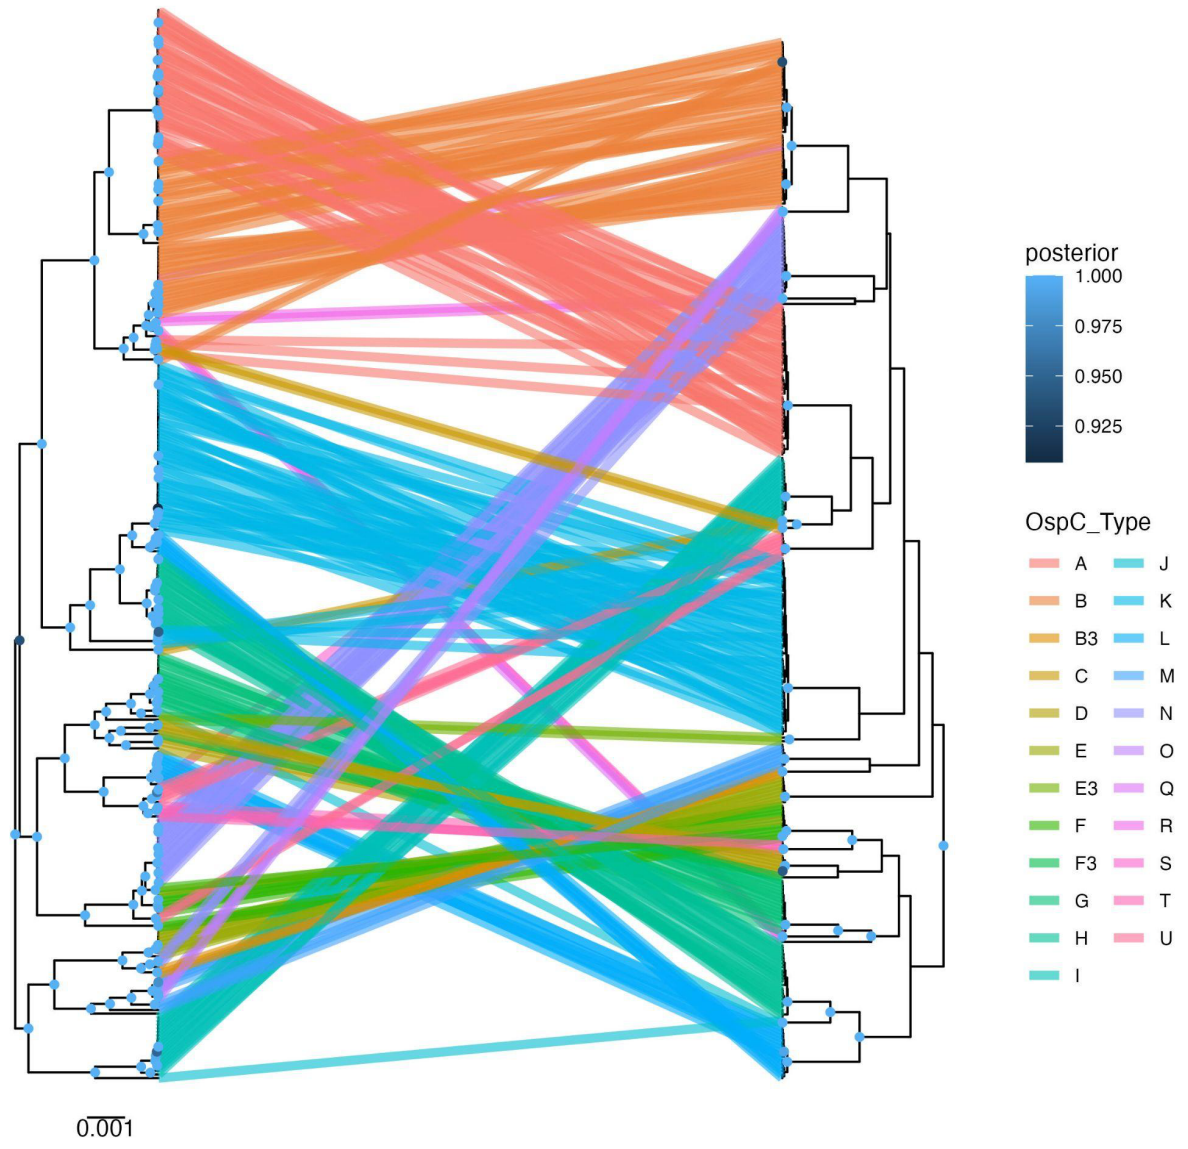

S2 Fig
