# Supplementary material for: Whole genome sequencing of human Borrelia burgdorferi isolates reveals linked blocks of accessory genome elements located on plasmids and associated with human dissemination
Source: PubMed Central journal article supplement (PMC10470944; doi:10.1371/journal.ppat.1011243), 2023-08-31
Supplement: ppat.1011243.s020.pdf [file ppat.1011243.s020.pdf]

A

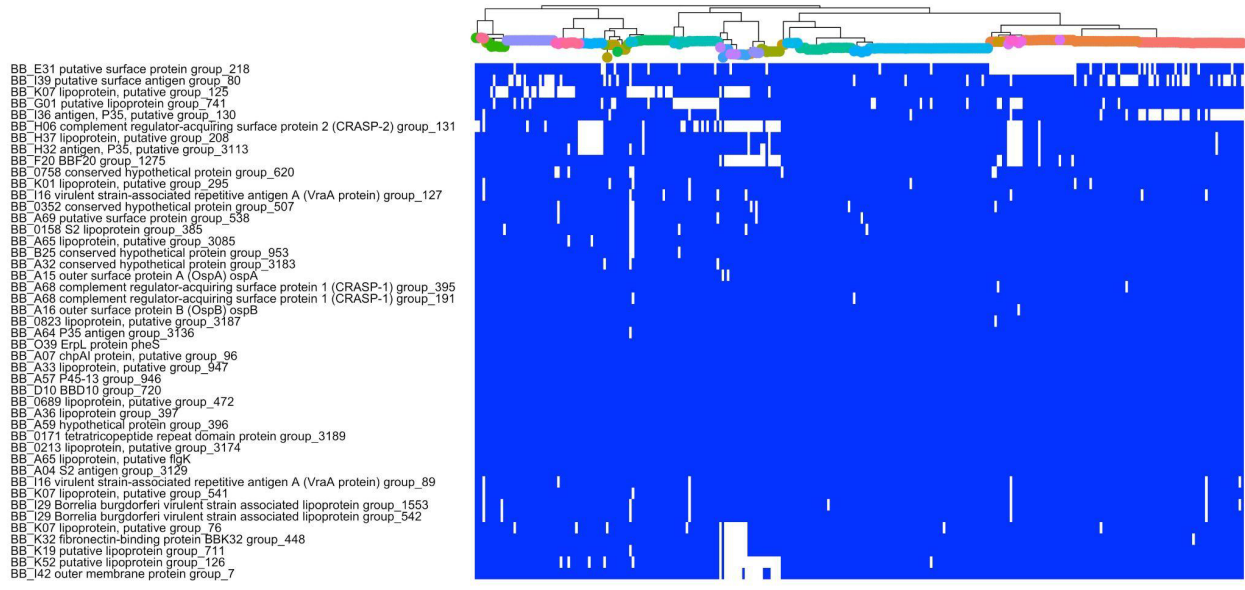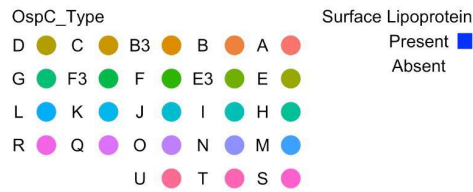

**B**

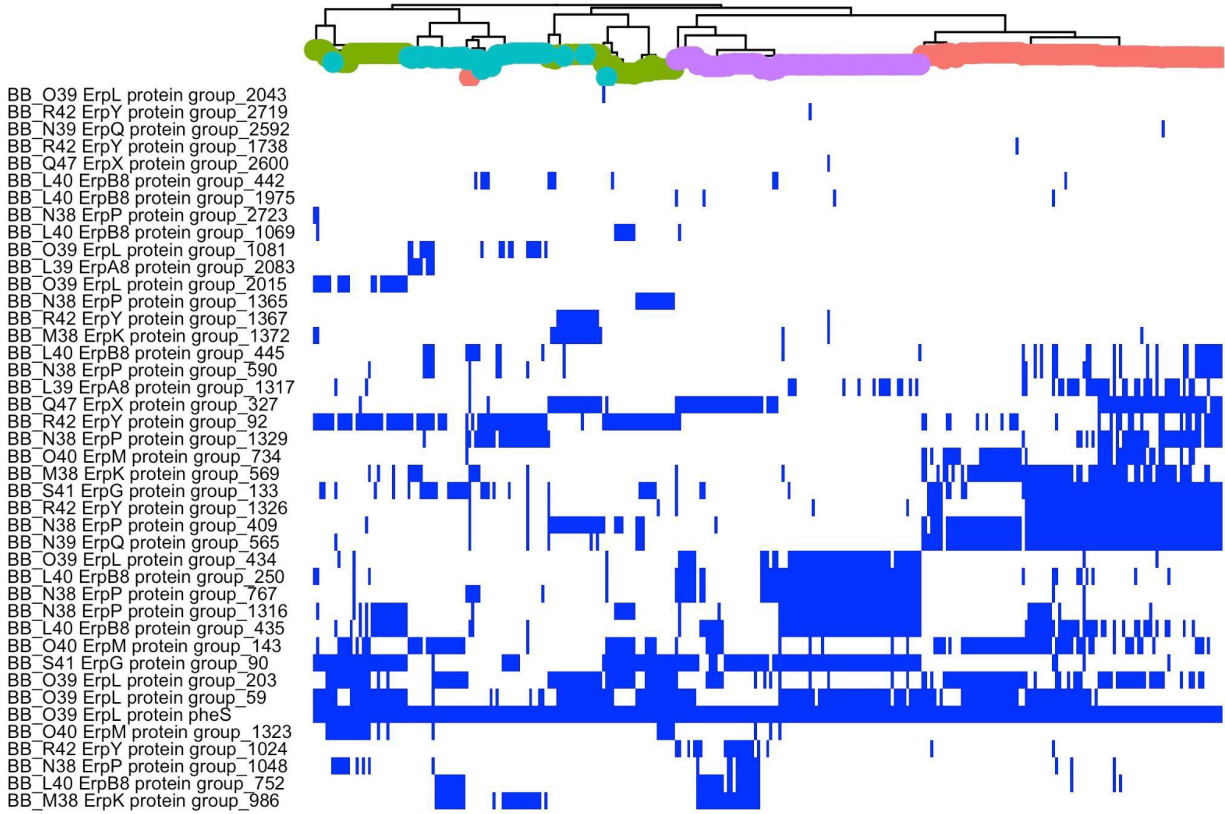

| WGS Group | Surface Lipoprotein |
|-----------|---------------------|
| A ●       | Present ■           |
| B.1 ●     | Absent              |
| B.2 ●     |                     |
| C ●       |                     |

C

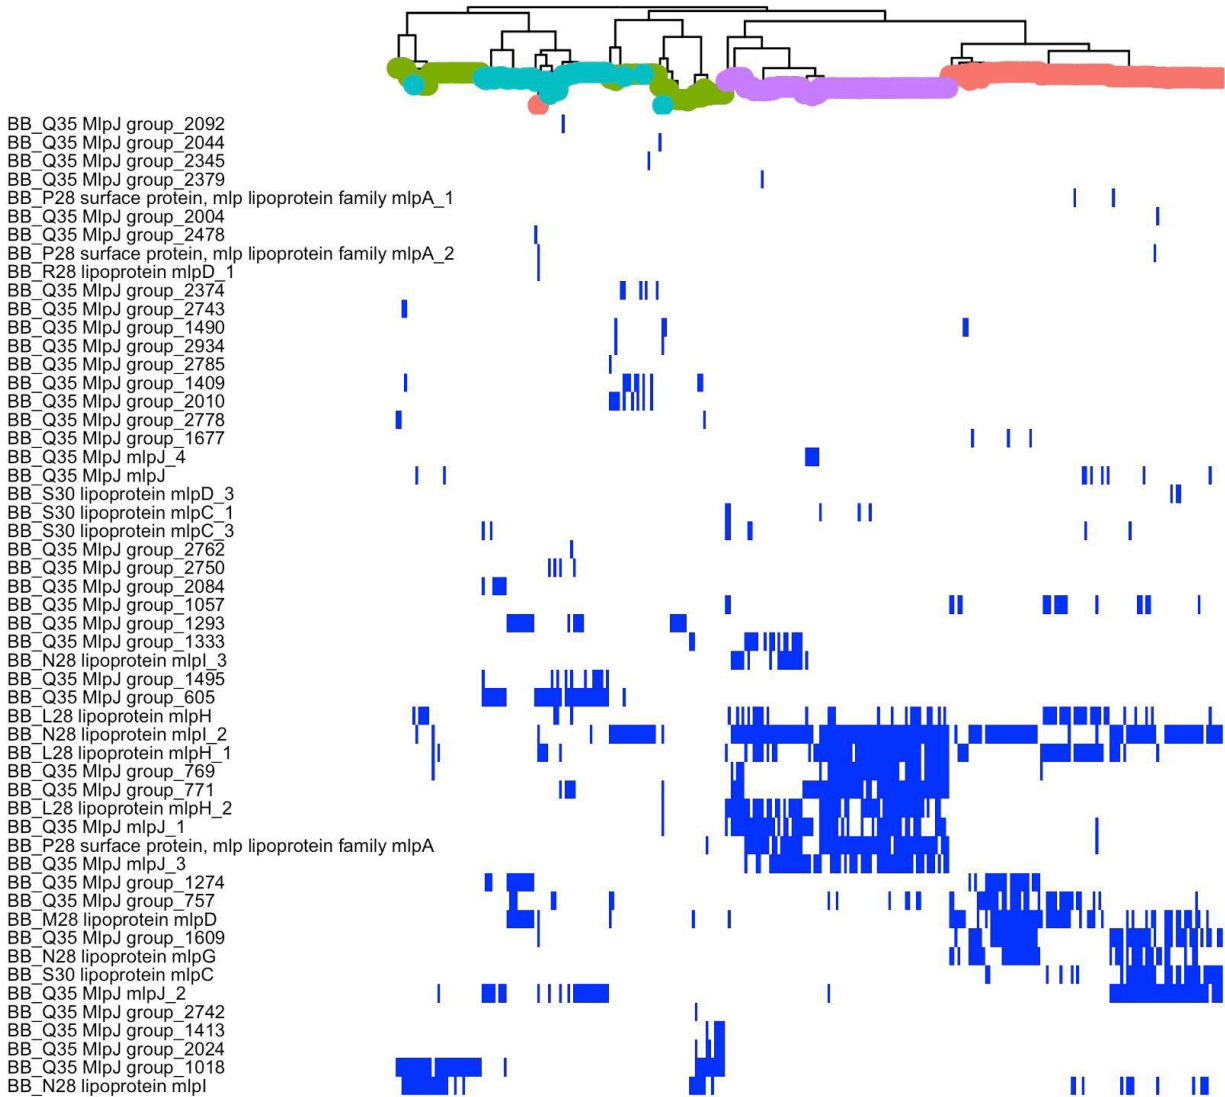

| WGS Group | Surface Lipoprotein |
|-----------|---------------------|
| A ●       | Present ■           |
| B.1 ●     | Absent              |
| B.2 ●     |                     |
| C ●       |                     |

D

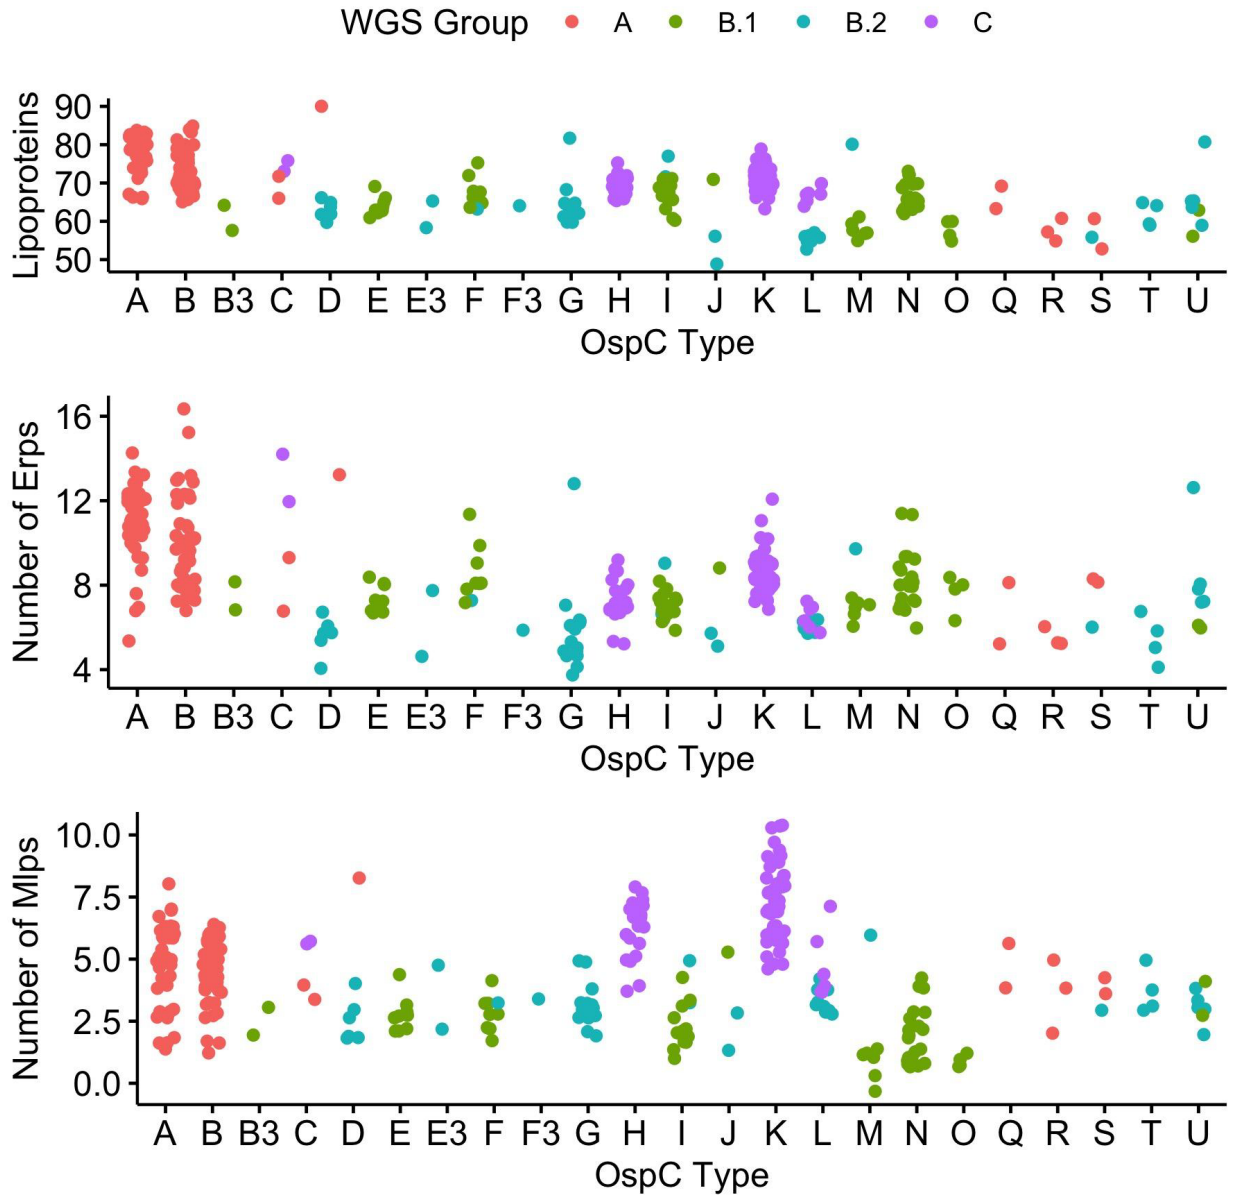

**F**

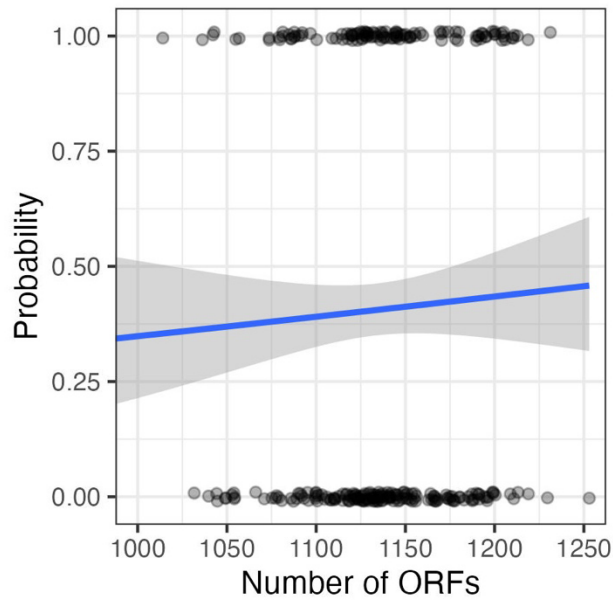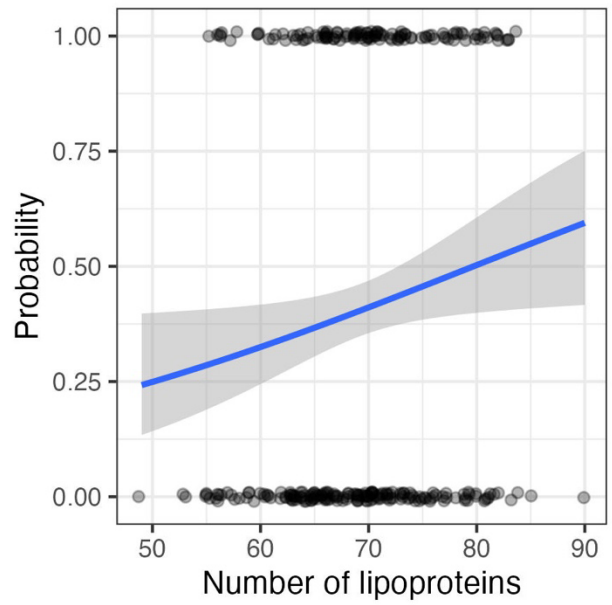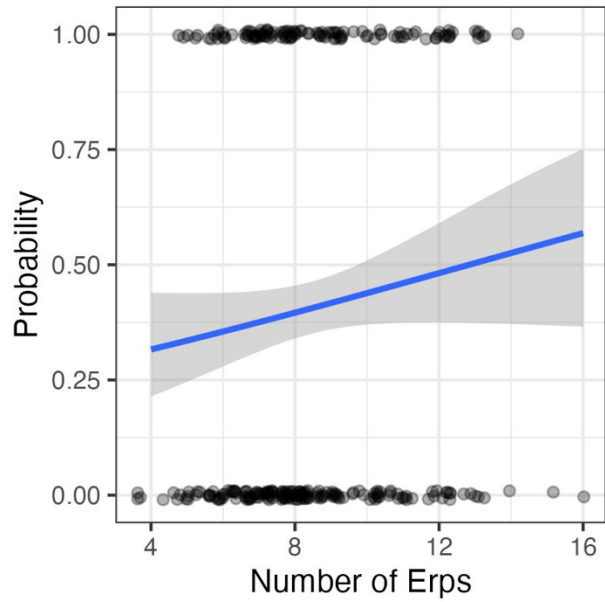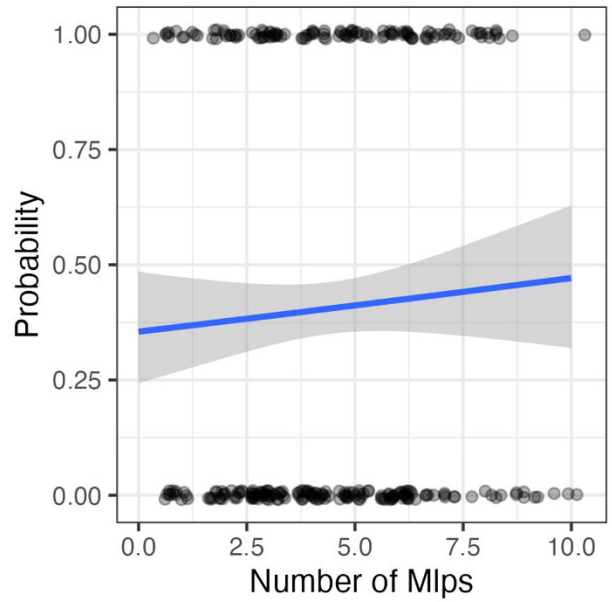

F

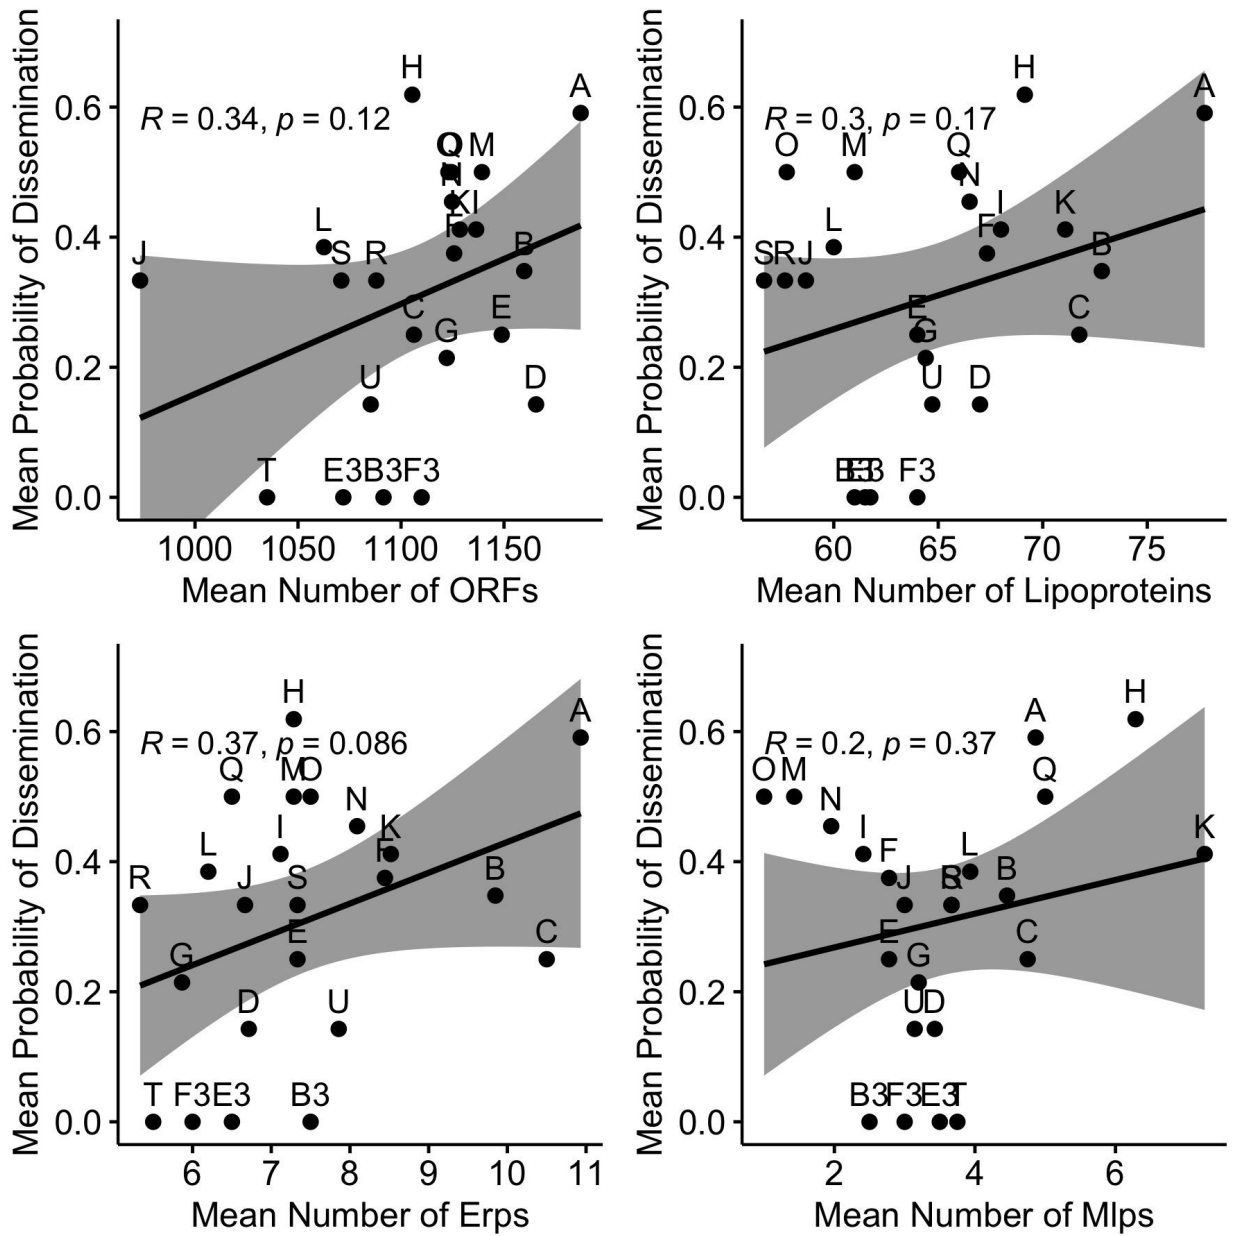

S7 Fig
